# Supplementary material
Source: Springer Nature journal article supplement (https://www.springermedizin.de/resource/supplementary/12936_2008_698_MOESM3_ESM.pdf/9548026)
Supplement: MOESM3 [file 9548026]

| <i>SNP</i>      | <i>Count</i> | <i>MAF</i> | <i>Forward Primer Sequence</i>        | <i>Reverse Primer Sequence</i>        | <i>Reporter 1 Sequence</i> | <i>Repo</i> |
|-----------------|--------------|------------|---------------------------------------|---------------------------------------|----------------------------|-------------|
| Pf_01_000130573 | 10           | 0.40       | CTTCCTCTTACCCATATTTCTCTTTCTCT         | TGTGAAAATGAGAAGAGAGAAATATGTGTGA       | TCTTCATTATATGCATCTTTT      | TTTCT       |
| Pf_01_000539044 | 10           | 0.40       | CCAAGAAGTCCAAGAATAATAGTTACTATCACA     | TTCATGTGTGGCTGCTTTCCTAT               | CAACCGTTTCTTTAGCC          | CAACC       |
| Pf_02_000842803 | 10           | 0.50       | ATTCCAAAATATGTTTGCTGCTTTTCA           | AGAAATGCAGTGGTACTTGTGCTA              | AGATTATTGCATCGTACTT        | AGATT       |
| Pf_04_000282592 | 10           | 0.30       | TGGTAATTTGTTGATTGCTTACATTGTTATGT      | GACAAGTTTTAATATGAACGGTCAGGTAGA        | ACTCGTTCATGCTATTATA        | ACTCG       |
| Pf_05_000931601 | 10           | 0.30       | CGATGACTACCATAATGATGTTTCATATTCACA     | TCCTCATTTCTGTTATTAATTTGCATCATCTTCA    | TTCGGGTGGTTGATCA           | TCGGG       |
| Pf_06_000145472 | 9            | 0.44       | TGTTTCATGTGCCCTCTTTTTCTG              | GGAAGGTAGAATATCAAATACAAGGGATGT        | AAGCATAGTAAGAAACATT        | AAGCA       |
| Pf_06_000937750 | 11           | 0.36       | CTAGCTCAGCTTCCAATTTGTCAAA             | GTCCACATCCATATACTGTGTACAA             | TGCATGTAGCAATACCCCA        | CATGT       |
| Pf_07_000277104 | 11           | 0.36       | AATTAATATTATGAATATGAGTACTCAGCATTATCTT | ACGTCCATATGTTGAAGATGATTGCA            | CCACCGAACTTATATTT          | CACCG       |
| Pf_07_000490877 | 12           | 0.42       | CGTAAACCAGGAGTAAGACGTAACCT            | AGATGAGTTAGCAACGAAACCATCAT            | TTCCATTAGCTAAATTC          | CATTA       |
| Pf_07_000545046 | 10           | 0.30       | GGATGTATGACAGCTTTTCTAATTTCTCTCT       | CCATCCTTTTATGAATGCTAAGAGAATACGT       | TCTTAAGCCGTTTAGTG          | TCTTA       |
| Pf_07_000657939 | 9            | 0.22       | CGTCCACTTATGATAATGACCTGAAA            | TGCTTTCGTTTATATTGCAACATTTCTTCA        | ACGATCGTCAAATTC            | ACGAT       |
| Pf_07_000671839 | 10           | 0.20       | GGAACCATTCATAGTTTAGTAGAATCAACCA       | AGTAGTCATGTGATATATGATTTTGTGGCAA       | CTTTTTCATTTTCATTTAATAAA    | TTTTC       |
| Pf_07_000683772 | 7            | 0.43       | CTTTTATCGTACCACCATTAACTTTTGGGA        | ATAAAGATTTTATCATTCTGTTACAAATAACAATGAA | CATCATCATGATGGTTCAG        | CATCA       |
| Pf_07_000792356 | 9            | 0.22       | TCGTTTAATGGGACTCTCTGTTTTCG            | ACTAAGTCCAATAGTTTGTATATTCCTTGTTTT     | ACCATACCAAATTC             | CCATA       |
| Pf_07_001415182 | 16           | 0.50       | AGGTACTGATTATTGGAATGATTGAGCAA         | ACTTCCACCCTCATCACGAAA                 | AGCTTATCATTTTTTTTATTCC     | CTTAT       |
| Pf_08_000613716 | 8            | 0.38       | CACCTCAAATCTTTTCCAGTTATTTTCTATCCAT    | TGGGAAAGAATTAACAATACTTATAAGTGCATAAATA | AAAACTTCATTTAAAATCA        | ACTTC       |
| Pf_09_000634010 | 7            | 0.43       | AATGTTAATTTTATTTTCATCATCCGCATTTAATTT  | AAATACCATGTGTACCTGTTGTGGAT            | CCCTCAATCCACTTTTATA        | CCCTC       |
| Pf_10_000082376 | 4            | 0.50       | TGTCGTTATTAATAATTTAAAGTTGACT          | AGAAAGTATACATTTGTCCGCCGAA             | ACGACATTGAAATTTTAT         | ACGAC       |
| Pf_10_001403751 | 9            | 0.33       | ACAAGAACCCTGTTACCTACATTA              | CTGGTTTAGTGGATTACCTTCAGA              | AATGAAAACGTTACTCCC         | ATGAA       |
| Pf_11_000117114 | 7            | 0.43       | ATTTTCATAAGAAGCTTCCATCTCCTT           | AAGTATCTTGCTCGTTTGTATAAAGCA           | AAATTTTCATCCAAAAGTAATT     | TTTCA       |
| Pf_11_000406215 | 12           | 0.42       | ACGAATGAACAAAATATGATACACAGGATGA       | CTGATGACTTTTTTCAAGTTCAATTTTGGATT      | CTACAGCTAGTAATATTTT        | CAGCT       |
| Pf_13_000158614 | 7            | 0.29       | AGTGTGAGCTTTCGTAATATTTTAGTGAAGA       | AGAGGATATCCAATAGGGTGTGTT              | ATTTTTGGACCCAAAGCTA        | ATTTT       |
| Pf_13_001429265 | 12           | 0.42       | CACACATAFCAAAATCGCATTCATCCT           | GAAAGGTATTCAAACCATAAACAAATGGATGA      | CCTCCAGCAGTATATAC          | CCTCC       |
| Pf_14_000755729 | 10           | 0.40       | CGTAACAAATCATCAATTAAGTCATCCGAAA       | CAAATCTTGAGGAATAGGTTTATATGCTGAT       | TTTTAAATTTTCAATTTTTTTG     | AAATT       |
